# Supplementary material
Source: Research Square preprint supplement (doi:10.21203/rs.3.rs-9496409/v1)
Supplement: Supplementary file 1 [file ec2f7d41ea9b2b978ef780e2.pdf]

## Supplemental Information

**Table 1** Statistical analysis for comorbid physical and mental health conditions

Sample size = 43

| Major depressive disorder | Emotional abuse   | Physical abuse    | Neglect           | Sexual abuse      |
|---------------------------|-------------------|-------------------|-------------------|-------------------|
| 0 – 5 years old           | 1.00              | 1.00              | 1.00              | 1.00              |
| 6 – 10 years old          | 1.72 [0.69, 4.34] | 1.18 [0.39, 3.59] | 1.35 [0.56, 3.28] | 1.36 [0.46, 4.06] |
| 11 – 14 years old         | 1.53 [0.62, 3.80] | 1.36 [0.46, 4.06] | 1.11 [0.45, 2.71] | 1.00 [0.32, 3.14] |
| 15 – 18 years old         | 0.75 [0.32, 1.77] | 1.00 [0.32, 3.14] | 0.90 [0.36, 2.23] | 1.00 [0.32, 3.14] |

Sample size = 22

| Perimenopausal depression | Emotional abuse   | Physical abuse     | Neglect           | Sexual abuse       |
|---------------------------|-------------------|--------------------|-------------------|--------------------|
| 0 – 5 years old           | 1.00              | 1.00               | 1.00              | 1.00               |
| 6 – 10 years old          | 2.14 [0.63, 7.30] | 2.38 [0.51, 11.05] | 1.59 [0.41, 6.07] | 2.38 [0.51, 11.05] |
| 11 – 14 years old         | 2.14 [0.63, 7.30] | 1.41 [0.28, 7.18]  | 1.59 [0.41, 6.07] | 1.86 [0.39, 8.99]  |
| 15 – 18 years old         | 2.14 [0.63, 7.30] | 1.41 [0.28, 7.18]  | 1.59 [0.41, 6.07] | 1.41 [0.28, 7.18]  |

Sample size = 33

| PMDD              | Emotional abuse   | Physical abuse     | Neglect           | Sexual abuse       |
|-------------------|-------------------|--------------------|-------------------|--------------------|
| 0 – 5 years old   | 1.00              | 1.00               | 1.00              | 1.00               |
| 6 – 10 years old  | 1.67 [0.62, 4.52] | 2.77 [0.50, 15.42] | 1.15 [0.41, 3.24] | 3.44 [0.64, 18.51] |
| 11 – 14 years old | 1.92 [0.70, 5.26] | 2.77 [0.50, 15.42] | 1.31 [0.47, 3.67] | 1.55 [0.24, 9.94]  |
| 15 – 18 years old | 1.13 [0.43, 2.99] | 2.14 [0.36, 12.57] | 1.50 [0.54, 4.14] | 3.44 [0.64, 18.51] |

Sample size = 27

| GAD               | Emotional abuse                               | Physical abuse    | Neglect           | Sexual abuse      |
|-------------------|-----------------------------------------------|-------------------|-------------------|-------------------|
| 0 – 5 years old   | 1.00                                          | 1.00              | 1.00              | 1.00              |
| 6 – 10 years old  | <b>6.25 [1.20, 32.47]</b><br>* ( $p = 0.03$ ) | 2.01 [0.51, 7.90] | 1.68 [0.53, 5.37] | 2.01 [0.51, 7.90] |
| 11 – 14 years old | <b>6.25 [1.20, 32.47]</b><br>* ( $p = 0.03$ ) | 2.42 [0.63, 9.30] | 1.43 [0.44, 4.63] | 1.64 [0.41, 6.64] |

|                   |                   |                   |                   |                   |
|-------------------|-------------------|-------------------|-------------------|-------------------|
| 15 – 18 years old | 1.43 [0.44, 4.63] | 1.64 [0.41, 6.64] | 1.43 [0.44, 4.63] | 2.01 [0.51, 7.90] |
|-------------------|-------------------|-------------------|-------------------|-------------------|

Sample size = 48

| <b>CPTSD</b>      | <b>Emotional abuse</b> | <b>Physical abuse</b> | <b>Neglect</b>    | <b>Sexual abuse</b> |
|-------------------|------------------------|-----------------------|-------------------|---------------------|
| 0 – 5 years old   | 1.00                   | 1.00                  | 1.00              | 1.00                |
| 6 – 10 years old  | 2.02 [0.83, 4.92]      | 2.08 [0.70, 6.18]     | 1.31 [0.57, 3.02] | 2.06 [0.77, 5.49]   |
| 11 – 14 years old | 1.80 [0.75, 4.32]      | 1.62 [0.53, 4.96]     | 1.31 [0.57, 3.02] | 1.32 [0.47, 3.69]   |
| 15 – 18 years old | 1.09 [0.48, 2.51]      | 1.20 [0.37, 3.86]     | 1.20 [0.52, 2.77] | 1.67 [0.61, 4.54]   |

Sample size = 51

| <b>Other mental health condition</b> | <b>Emotional abuse</b> | <b>Physical abuse</b> | <b>Neglect</b>    | <b>Sexual abuse</b> |
|--------------------------------------|------------------------|-----------------------|-------------------|---------------------|
| 0 – 5 years old                      | 1.00                   | 1.00                  | 1.00              | 1.00                |
| 6 – 10 years old                     | 1.63 [0.74, 3.61]      | 2.13 [0.50, 9.04]     | 1.26 [0.49, 3.25] | 1.46 [0.43, 4.96]   |
| 11 – 14 years old                    | 1.39 [0.63, 3.09]      | 2.98 [0.74, 11.94]    | 1.40 [0.55, 3.57] | 1.23 [0.35, 4.31]   |
| 15 – 18 years old                    | 1.28 [0.58, 2.86]      | 1.74 [0.39, 7.70]     | 1.26 [0.49, 3.25] | 1.46 [0.43, 4.96]   |

Sample size = 10

| <b>Hyperlipidaemia</b> | <b>Emotional abuse</b> | <b>Physical abuse</b> | <b>Neglect</b>    | <b>Sexual abuse</b> |
|------------------------|------------------------|-----------------------|-------------------|---------------------|
| 0 – 5 years old        |                        |                       |                   |                     |
| 6 – 10 years old       | 1.00 [0.17, 5.77]      | 1.00 [0.02, 55.27]    | 1.00 [0.15, 6.77] | 1.00 [0.02, 55.27]  |
| 11 – 14 years old      | 1.50 [0.26, 8.82]      | 3.32 [0.12, 91.61]    | 1.00 [0.15, 6.77] | 1.00 [0.02, 55.27]  |
| 15 – 18 years old      | 1.00 [0.17, 5.77]      | 1.00 [0.02, 55.27]    | 1.00 [0.15, 6.77] | 1.00 [0.02, 55.27]  |

Sample size = 13

| <b>PCOS</b>       | <b>Emotional abuse</b> | <b>Physical abuse</b> | <b>Neglect</b>     | <b>Sexual abuse</b> |
|-------------------|------------------------|-----------------------|--------------------|---------------------|
| 0 – 5 years old   |                        |                       |                    |                     |
| 6 – 10 years old  | 2.85 [0.53, 15.47]     | 1.65 [0.23, 11.99]    | 1.48 [0.26, 8.50]  | 2.44 [0.36, 16.55]  |
| 11 – 14 years old | 2.85 [0.53, 15.47]     | 2.44 [0.36, 16.55]    | 2.08 [0.38, 11.48] | 1.00 [0.12, 8.42]   |
| 15 – 18 years old | 1.92 [0.39, 9.60]      | 1.00 [0.12, 8.42]     | 1.48 [0.26, 8.50]  | 1.00 [0.12, 8.42]   |

Sample size = 13

| <b>Chronic fatigue syndrome</b> | <b>Emotional abuse</b> | <b>Physical abuse</b> | <b>Neglect</b>    | <b>Sexual abuse</b> |
|---------------------------------|------------------------|-----------------------|-------------------|---------------------|
| 0 – 5 years old                 |                        |                       |                   |                     |
| 6 – 10 years old                | 0.68 [0.12, 3.87]      | 1.00 [0.16, 6.20]     | 1.00 [0.16, 6.20] | 1.00 [0.16, 6.20]   |
| 11 – 14 years old               | 1.00 [0.16, 6.20]      | 1.00 [0.16, 6.20]     | 0.61 [0.08, 4.41] | 0.61 [0.08, 4.41]   |
| 15 – 18 years old               | 0.26 [0.05, 1.39]      | 0.28 [0.02, 3.10]     | 0.28 [0.02, 3.10] | 0.61 [0.08, 4.41]   |

Sample size = 13

| <b>Fibromyalgia</b> | <b>Emotional abuse</b> | <b>Physical abuse</b> | <b>Neglect</b>    | <b>Sexual abuse</b> |
|---------------------|------------------------|-----------------------|-------------------|---------------------|
| 0 – 5 years old     |                        |                       |                   |                     |
| 6 – 10 years old    | 1.48 [0.26, 8.50]      | 1.41 [0.28, 7.13]     | 1.00 [0.21, 4.86] | 2.08 [0.38, 11.48]  |
| 11 – 14 years old   | 2.44 [0.36, 16.55]     | 1.41 [0.28, 7.13]     | 0.71 [0.14, 3.61] | 1.48 [0.26, 8.50]   |
| 15 – 18 years old   | 0.71 [0.14, 3.61]      | 1.00 [0.19, 5.29]     | 0.48 [0.09, 2.65] | 1.48 [0.26, 8.50]   |

Sample size = 10

| <b>IBS</b>        | <b>Emotional abuse</b> | <b>Physical abuse</b> | <b>Neglect</b>     | <b>Sexual abuse</b> |
|-------------------|------------------------|-----------------------|--------------------|---------------------|
| 0 – 5 years old   |                        |                       |                    |                     |
| 6 – 10 years old  | 2.25 [0.17, 29.77]     | 2.33 [0.37, 14.61]    | 1.71 [0.22, 13.41] | 1.71 [0.22, 13.41]  |
| 11 – 14 years old | 1.00 [0.11, 8.95]      | 1.56 [0.24, 9.91]     | 1.00 [0.11, 8.95]  | 2.67 [0.36, 19.71]  |
| 15 – 18 years old | 0.58 [0.07, 4.56]      | 1.00 [0.15, 6.77]     | 1.00 [0.11, 8.95]  | 4.00 [0.55, 29.10]  |

Sample size = 13

| <b>Autoimmune condition</b> | <b>Emotional abuse</b> | <b>Physical abuse</b> | <b>Neglect</b>     | <b>Sexual abuse</b> |
|-----------------------------|------------------------|-----------------------|--------------------|---------------------|
| 0 – 5 years old             |                        |                       |                    |                     |
| 6 – 10 years old            | 1.93 [0.39, 9.60]      | 3.60 [0.32, 40.23]    | 1.00 [0.12, 8.42]  | 3.60 [0.32, 40.23]  |
| 11 – 14 years old           | 2.86 [0.53, 15.47]     | 1.00 [0.06, 17.90]    | 1.00 [0.12, 8.42]  | 1.00 [0.06, 17.90]  |
| 15 – 18 years old           | 1.93 [0.39, 9.60]      | 2.18 [0.17, 27.56]    | 1.65 [0.23, 11.99] | 2.18 [0.17, 27.56]  |

Sample size = 44

| <b>Other physical health condition</b> | <b>Emotional abuse</b> | <b>Physical abuse</b> | <b>Neglect</b>    | <b>Sexual abuse</b> |
|----------------------------------------|------------------------|-----------------------|-------------------|---------------------|
| 0 – 5 years old                        |                        |                       |                   |                     |
| 6 – 10 years old                       | 1.59 [0.68, 3.71]      | 2.57 [0.73, 9.09]     | 1.26 [0.49, 3.22] | 2.94 [0.85, 10.23]  |
| 11 – 14 years old                      | 1.59 [0.68, 3.71]      | 1.89 [0.51, 6.99]     | 1.26 [0.49, 3.22] | 1.58 [0.41, 6.04]   |
| 15 – 18 years old                      | 1.10 [0.47, 2.53]      | 1.58 [0.41, 6.04]     | 1.26 [0.49, 3.22] | 1.28 [0.32, 5.13]   |
